# Supplementary material
Source: PubMed Central journal article supplement (PMC2758927)
Supplement: NIHMS98114-supplement-supplement_1.pdf [file NIHMS98114-supplement-supplement_1.pdf]

Table S1. 40 selected SNPs tested for association of tanning ability in the controls of the skin cancer study within the NHS and pooled data.

| SNP        | Chromosome | Location  | Gene Neighborhood | WT/VT | in skin cancer controls |      |         | in pooled data |      |         |
|------------|------------|-----------|-------------------|-------|-------------------------|------|---------|----------------|------|---------|
|            |            |           |                   |       | beta                    | s.e. | p value | beta           | s.e. | p value |
| rs966321   | 1          | 4225577   | LOC401937         | A/C   | *                       | *    | *       | *              | *    | *       |
| rs1028889  | 1          | 98518442  |                   | C/T   | *                       | *    | *       | *              | *    | *       |
| rs12750212 | 1          | 206070491 |                   | G/A   | *                       | *    | *       | *              | *    | *       |
| rs1345151  | 2          | 30286837  | YPEL5             | G/A   | *                       | *    | *       | *              | *    | *       |
| rs12493507 | 3          | 140744316 | RBP1              | C/T   | *                       | *    | *       | *              | *    | *       |
| rs11931790 | 4          | 187715837 | LOC285441         | C/T   | *                       | *    | *       | *              | *    | *       |
| rs11133935 | 5          | 2244437   |                   | C/T   | *                       | *    | *       | *              | *    | *       |
| rs40132    | 5          | 33986460  | MATP              | T/C   | *                       | *    | *       | *              | *    | *       |
| rs35391    | 5          | 33991430  | MATP              | C/T   | *                       | *    | *       | *              | *    | *       |
| rs28777    | 5          | 33994716  | MATP              | A/C   | -0.18                   | 0.12 | 0.11    | -0.41          | 0.06 | 2.2E-10 |
| rs32579    | 5          | 149191041 | PPARGC1B          | G/A   | *                       | *    | *       | *              | *    | *       |
| rs12203592 | 6          | 341321    | IRF4              | C/T   | 0.40                    | 0.06 | 1.7E-12 | 0.40           | 0.03 | 4.5E-42 |
| rs12210050 | 6          | 420489    | EXOC2             | C/T   | *                       | *    | *       | *              | *    | *       |
| rs1409937  | 9          | 75220958  |                   | A/G   | *                       | *    | *       | *              | *    | *       |
| rs10831496 | 11         | 88197639  | GRM5              | A/G   | *                       | *    | *       | *              | *    | *       |
| rs10830236 | 11         | 88540464  | TYR               | C/T   | *                       | *    | *       | *              | *    | *       |
| rs1393350  | 11         | 88650694  | TYR               | G/A   | *                       | *    | *       | *              | *    | *       |
| rs11054623 | 12         | 7626586   |                   | G/T   | *                       | *    | *       | *              | *    | *       |
| rs1805761  | 12         | 8990800   | M6PR              | A/G   | *                       | *    | *       | *              | *    | *       |
| rs7974991  | 12         | 19082600  | LOC90193          | G/A   | *                       | *    | *       | *              | *    | *       |
| rs7969151  | 12         | 52445544  | LOC440100         | G/A   | *                       | *    | *       | *              | *    | *       |
| rs17094273 | 14         | 96173560  |                   | G/A   | *                       | *    | *       | *              | *    | *       |
| rs7495174  | 15         | 26017833  | OCA2              | A/G   | -0.22                   | 0.08 | 4.1E-03 | -0.26          | 0.04 | 1.5E-10 |
| rs12913832 | 15         | 26039213  | HERC2/OCA2        | G/A   | -0.33                   | 0.05 | 4.4E-11 | -0.26          | 0.03 | 3.3E-25 |
| rs352935   | 16         | 88176081  | MC1R              | A/G   | *                       | *    | *       | *              | *    | *       |
| rs464349   | 16         | 88183752  | MC1R              | C/T   | *                       | *    | *       | *              | *    | *       |
| rs154659   | 16         | 88194838  | MC1R              | T/C   | *                       | *    | *       | *              | *    | *       |
| rs164741   | 16         | 88219799  | MC1R              | C/T   | 0.10                    | 0.05 | 0.05    | 0.16           | 0.02 | 1.0E-10 |
| rs7188458  | 16         | 88253985  | MC1R              | G/A   | 0.11                    | 0.05 | 0.02    | 0.14           | 0.02 | 6.9E-09 |
| rs258322   | 16         | 88283404  | MC1R              | C/T   | 0.27                    | 0.07 | 2.1E-04 | 0.39           | 0.04 | 1.2E-24 |

|            |    |          |        |     |       |      |         |       |      |         |
|------------|----|----------|--------|-----|-------|------|---------|-------|------|---------|
| rs7204478  | 16 | 88322986 | MC1R   | C/T | 0.09  | 0.04 | 0.05    | 0.11  | 0.02 | 2.4E-06 |
| rs8049897  | 16 | 88551703 | MC1R   | G/A | 0.24  | 0.06 | 2.0E-04 | 0.30  | 0.03 | 9.5E-22 |
| rs4408545  | 16 | 88571529 | MC1R   | T/C | 0.11  | 0.04 | 0.01    | 0.16  | 0.02 | 1.2E-12 |
| rs4238833  | 16 | 88578190 | MC1R   | T/G | 0.15  | 0.05 | 2.3E-03 | 0.18  | 0.02 | 1.5E-14 |
| rs4785763  | 16 | 88594437 | MC1R   | C/A | 0.14  | 0.05 | 3.7E-03 | 0.20  | 0.02 | 4.3E-17 |
| rs11648785 | 16 | 88612062 | MC1R   | C/T | *     | *    | *       | *     | *    | *       |
| rs2241039  | 16 | 88615938 | MC1R   | C/T | -0.13 | 0.04 | 3.0E-03 | -0.13 | 0.02 | 3.2E-08 |
| rs10852800 | 17 | 11825241 | ZNF18  | C/T | *     | *    | *       | *     | *    | *       |
| rs9960018  | 18 | 3783080  | DLGAP1 | C/T | *     | *    | *       | *     | *    | *       |
| rs7279297  | 21 | 42100984 | PRDM15 | A/G | *     | *    | *       | *     | *    | *       |

\* The results are presented in Table 2.

The results presented here are from our previous GWAS for hair color.

Table S2. 27 selected SNPs in the initial GWAS and controls of the skin cancer study within the NHS, and pooled data after excluding individuals with red hair color.

| SNP        | Chromosome | Location  | Gene Neighborhood | WT/VT | in initial scan |      |         | in skin cancer control |      |         | in pooled data |      |         |
|------------|------------|-----------|-------------------|-------|-----------------|------|---------|------------------------|------|---------|----------------|------|---------|
|            |            |           |                   |       | beta            | s.e. | p value | beta                   | s.e. | p value | beta           | s.e. | p value |
| rs966321   | 1          | 4225577   | LOC401937         | A/C   | -0.11           | 0.03 | 1.0E-05 | -0.13                  | 0.05 | 5.6E-03 | -0.13          | 0.02 | 2.2E-08 |
| rs12750212 | 1          | 206070491 |                   | G/A   | -0.18           | 0.04 | 2.0E-05 | -0.06                  | 0.08 | 0.44    | -0.17          | 0.04 | 1.0E-05 |
| rs1028889  | 1          | 98518442  |                   | C/T   | 0.11            | 0.03 | 1.3E-04 | 0.02                   | 0.05 | 0.64    | 0.09           | 0.03 | 6.5E-04 |
| rs1345151  | 2          | 30286837  | YPEL5             | G/A   | 0.12            | 0.03 | 1.8E-04 | 0.05                   | 0.06 | 0.34    | 0.11           | 0.03 | 1.1E-04 |
| rs12493507 | 3          | 140744316 | RBP1              | C/T   | 0.16            | 0.04 | 8.0E-05 | 0.05                   | 0.07 | 0.46    | 0.14           | 0.04 | 1.6E-04 |
| rs11931790 | 4          | 187715837 | LOC285441         | C/T   | -0.13           | 0.03 | 3.0E-05 | -0.03                  | 0.05 | 0.54    | -0.10          | 0.03 | 1.2E-04 |
| rs35391    | 5          | 33991430  | MATP              | C/T   | -0.43           | 0.08 | 1.5E-07 | -0.35                  | 0.13 | 8.4E-03 | -0.47          | 0.07 | 1.8E-11 |
| rs40132    | 5          | 33986460  | MATP              | T/C   | -0.50           | 0.11 | 3.5E-06 | -0.51                  | 0.18 | 4.5E-03 | -0.56          | 0.09 | 1.4E-09 |
| rs11133935 | 5          | 2244437   |                   | C/T   | -0.12           | 0.03 | 1.0E-05 | -0.04                  | 0.04 | 0.33    | -0.09          | 0.02 | 1.1E-04 |
| rs32579    | 5          | 149191041 | PPARGC1B          | G/A   | -0.12           | 0.03 | 1.0E-05 | -0.05                  | 0.05 | 0.26    | -0.11          | 0.02 | 1.0E-05 |
| rs12210050 | 6          | 420489    | EXOC2             | C/T   | 0.15            | 0.03 | 2.0E-05 | 0.28                   | 0.06 | 8.0E-07 | 0.21           | 0.03 | 7.0E-13 |
| rs1409937  | 9          | 75220958  |                   | A/G   | 0.11            | 0.03 | 2.0E-05 | 0.06                   | 0.04 | 0.19    | 0.09           | 0.02 | 5.0E-05 |
| rs1393350  | 11         | 88650694  | TYR               | G/A   | 0.16            | 0.03 | 3.7E-08 | 0.17                   | 0.05 | 3.3E-04 | 0.19           | 0.03 | 6.7E-14 |
| rs10831496 | 11         | 88197639  | GRM5              | A/G   | -0.14           | 0.03 | 3.7E-07 | -0.09                  | 0.05 | 0.07    | -0.14          | 0.02 | 4.0E-09 |
| rs10830236 | 11         | 88540464  | TYR               | C/T   | 0.11            | 0.03 | 4.0E-05 | 0.08                   | 0.05 | 0.11    | 0.12           | 0.02 | 2.5E-07 |
| rs1805761  | 12         | 8990800   | M6PR              | A/G   | 0.11            | 0.03 | 3.0E-05 | 0.04                   | 0.04 | 0.39    | 0.10           | 0.02 | 2.0E-05 |
| rs7974991  | 12         | 19082600  | LOC90193          | G/A   | 0.23            | 0.06 | 5.0E-05 | -0.08                  | 0.09 | 0.39    | 0.13           | 0.05 | 9.5E-03 |
| rs7969151  | 12         | 52445544  | LOC440100         | G/A   | 0.11            | 0.03 | 3.2E-04 | 0.09                   | 0.05 | 0.09    | 0.12           | 0.03 | 3.0E-05 |
| rs11054623 | 12         | 7626586   |                   | G/T   | -0.15           | 0.04 | 7.3E-04 | 0.02                   | 0.08 | 0.75    | -0.10          | 0.04 | 6.9E-03 |
| rs17094273 | 14         | 96173560  |                   | G/A   | 0.18            | 0.04 | 2.0E-05 | 0.19                   | 0.07 | 8.6E-03 | 0.19           | 0.04 | 3.3E-07 |
| rs11648785 | 16         | 88612062  | MC1R              | C/T   | -0.13           | 0.03 | 2.0E-06 | -0.10                  | 0.05 | 0.03    | -0.13          | 0.02 | 2.8E-08 |
| rs464349   | 16         | 88183752  | MC1R              | C/T   | -0.11           | 0.03 | 3.0E-05 | -0.12                  | 0.04 | 7.5E-03 | -0.12          | 0.02 | 5.6E-07 |
| rs352935   | 16         | 88176081  | MC1R              | A/G   | 0.10            | 0.03 | 1.8E-04 | 0.09                   | 0.04 | 0.03    | 0.10           | 0.02 | 1.0E-05 |
| rs154659   | 16         | 88194838  | MC1R              | T/C   | 0.11            | 0.03 | 2.2E-04 | 0.10                   | 0.05 | 0.06    | 0.12           | 0.03 | 3.1E-06 |
| rs10852800 | 17         | 11825241  | ZNF18             | C/T   | 0.15            | 0.03 | 1.0E-05 | 0.05                   | 0.06 | 0.43    | 0.12           | 0.03 | 2.0E-05 |
| rs9960018  | 18         | 3783080   | DLGAP1            | C/T   | -0.14           | 0.04 | 1.0E-04 | -0.05                  | 0.06 | 0.46    | -0.13          | 0.03 | 5.0E-05 |
| rs7279297  | 21         | 42100984  | PRDM15            | A/G   | -0.13           | 0.03 | 1.0E-05 | -0.02                  | 0.05 | 0.73    | -0.11          | 0.02 | 1.0E-05 |
